# Supplementary material
Source: HighWire-hosted journal article supplement (https://bmjopenquality.bmj.com/highwire/filestream/142009/field_highwire_adjunct_files/1/bmjoq-2020-001323supp002_data_supplement.pdf)

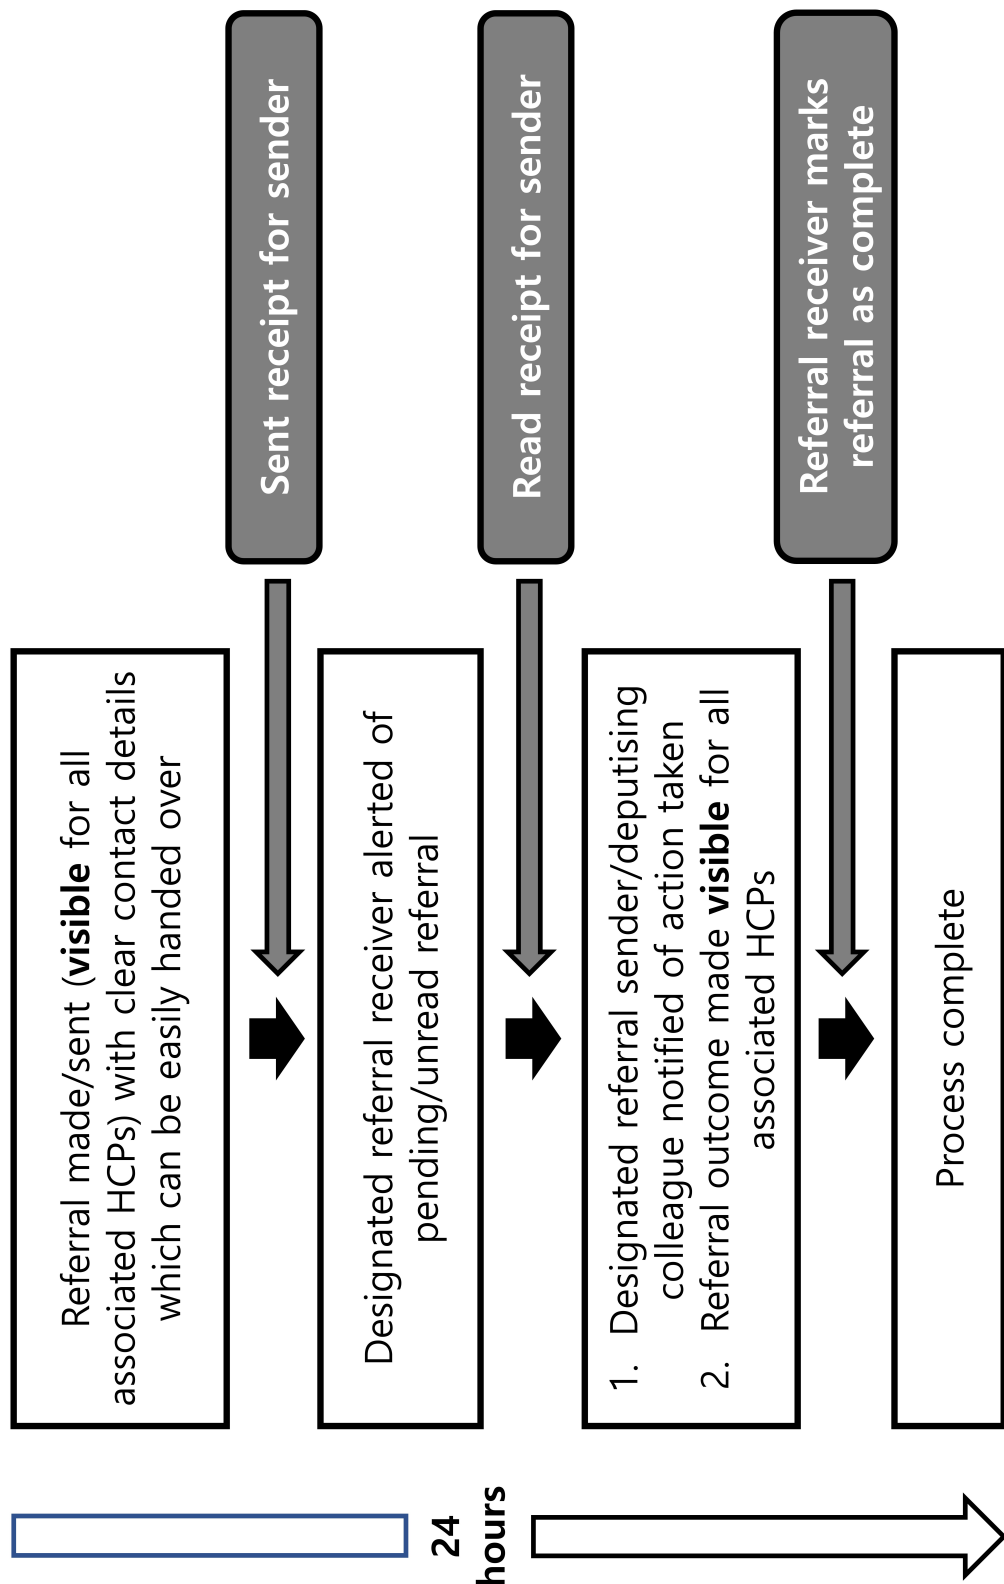

Supplement: bmjoq-2020-001323supp002_data_supplement.pdf [file bmjoq-2020-001323supp002_data_supplement.pdf]
